# Supplementary material for: UK-born Pakistani-origin infants are relatively more adipose than white British infants: findings from 8704 mother-offspring pairs in the Born-in-Bradford prospective birth cohort
Source: PubMed Central journal article supplement — J Epidemiol Community Health. 2013 Apr 16;67(7):544–51. doi: 10.1136/jech-2012-201891 (PMC3859677; doi:10.1136/jech-2012-201891), 2013-04-16
Supplement: jech-2012-201891-s1.pdf [file jech-2012-201891-s1.pdf]

**Supplementary table 1 Rationale for inclusion of covariables and expected direction of any effect on birth size association**

| <b>Characteristic</b>                               | <b>A priori expected direction of association of characteristic with birthweight</b>                  | <b>A priori expected direction of difference between Pakistani and White British pregnant women</b> | <b>A priori postulated direction of change in association with adjustment for characteristic</b> |
|-----------------------------------------------------|-------------------------------------------------------------------------------------------------------|-----------------------------------------------------------------------------------------------------|--------------------------------------------------------------------------------------------------|
| <b>Socioeconomic position</b>                       | Lower socioeconomic position associated with lower mean birthweight                                   | Pakistani women more likely to be of low socioeconomic position                                     | Attenuation towards the null                                                                     |
| <b>Smoking</b>                                      | Mean birthweight lower in infants of mothers who smoke during pregnancy                               | Pakistani women less likely to smoke                                                                | Strengthen away from the null                                                                    |
| <b>Alcohol</b>                                      | Mean birthweight lower in infants of mothers who drink heavily during pregnancy                       | Pakistani women less likely to drink alcohol                                                        | Strengthen away from the null                                                                    |
| <b>Maternal age</b>                                 | Lower mean birthweight at the extremes of very young and old maternal age                             | Pakistani women tend to start families younger and continue to an older age                         | Attenuation towards the null                                                                     |
| <b>Parity</b>                                       | Mean birthweight tends to increase with increasing parity to parity 4/5 and then flattens or declines | Pakistani women tend to have higher parity                                                          | Strengthen away from the null                                                                    |
| <b>Maternal height</b>                              | Mean birthweight and length higher in infants of taller mothers                                       | Pakistani women tend to be shorter                                                                  | Attenuation towards the null                                                                     |
| <b>Maternal BMI</b>                                 | Mean birthweight higher in infants of women with greater BMI                                          | Pakistani women tend to have a higher BMI                                                           | Strengthen away from the null                                                                    |
| <b>Maternal glycaemia</b>                           | Mean birthweight higher in women with gestational diabetes or glucose intolerance                     | Pakistani women more at risk of diabetes and glucose intolerance                                    | Strengthen away from the null                                                                    |
| <b>Maternal hypertensive disorders of pregnancy</b> | Mean birthweight lower in infants of women with pre-eclampsia                                         | Inconsistent results but some evidence that Pakistani women more at risk of pre-eclampsia           | Attenuation towards the null                                                                     |

These considerations are specific to the population studied here. For example, in this study all pregnant women over a given time period were invited to participate irrespective of their parity and therefore we a priori hypothesised that parity may strengthen the association in this study, but in a study that restricted participants to women in their first pregnancy, this would not be the case. These assumptions are all concerned with associations with birthweight for which there is a lot of published evidence. Some characteristics would plausibly have different associations with relative fat mass (i.e. in this cohort cord leptin differences following adjustment for birthweight) and skinfolds, but since there is little or no evidence of association of the characteristics with cord leptin/skinfolds in different ethnic groups we have focused here on birthweight only.

**Supplementary table 2 Characteristics of births by ethnicity and generation**

|                                                                   | White British (UK & Ireland) | All Pakistani births | Pakistani sub-groups defined by place of birth of parents |                             |                             |                                          |                    |
|-------------------------------------------------------------------|------------------------------|----------------------|-----------------------------------------------------------|-----------------------------|-----------------------------|------------------------------------------|--------------------|
|                                                                   |                              |                      | Pakistani: Both parents UK born                           | Pakistani: Mum only UK born | Pakistani: Dad only UK born | Pakistani: Both parents South Asian born | Pakistani: Other   |
| <b>Number of births</b>                                           | 4055                         | 4649                 | 492                                                       | 1192                        | 1104                        | 1411                                     | 450                |
| <b>Mean birth weight (g) (sd)</b>                                 | 3428 (481)                   | 3195 (461)           | 3176 (460)                                                | 3192 (454)                  | 3178 (454)                  | 3216 (474)                               | 3197 (458)         |
| <b>Low birthweight &lt;2500g N (%)</b>                            | 78 (2)                       | 263 (6)              | 34 (7)                                                    | 78 (7)                      | 52 (5)                      | 75 (5)                                   | 24 (5)             |
| <b>Sex N (%)</b><br>Male<br>Female                                | 2082(51)<br>1973(49)         | 2373(51)<br>2275(49) | 247(50)<br>245(50)                                        | 624(52)<br>567(48)          | 538(49)<br>566(51)          | 716(51)<br>695(49)                       | 248(55)<br>202(44) |
| <b>Maternal age N (%)</b><br>19 & under                           | 453(11)                      | 108(2)               | 15(3)                                                     | 27(2)                       | 18(2)                       | 10(0.5)                                  | 38(9)              |
| 20-29                                                             | 2256(56)                     | 2865(62)             | 317(65)                                                   | 763(64)                     | 752(68)                     | 708(50)                                  | 325(72)            |
| 30-39                                                             | 1264(31)                     | 1582(34)             | 157(31.5)                                                 | 372(31)                     | 326(29)                     | 645(46)                                  | 82(18)             |
| 40 & over                                                         | 82(2)                        | 94(2)                | 3(0.5)                                                    | 30(3)                       | 8(1)                        | 48(3.5)                                  | 5(1)               |
| <b>Mean maternal height (sd)</b>                                  | 1.64(6.2)                    | 1.60(5.7)            | 1.61(5.6)                                                 | 1.60(5.6)                   | 1.59(5.4)                   | 1.59(5.6)                                | 1.61(6.4)          |
| <b>Mean maternal BMI (sd)</b>                                     | 27(6.1)                      | 26(5.4)              | 24(4.6)                                                   | 27(5.8)                     | 24(4.6)                     | 26(5.5)                                  | 25(5.4)            |
| <b>Mean gestation at delivery (weeks) (sd)</b>                    | 39.6(1.2)                    | 39.4(1.2)            | 39.4(1.2)                                                 | 39.4(1.2)                   | 39.4(1.1)                   | 39.3(1.2)                                | 39.3(1.1)          |
| <b>Smoked cigarettes during pregnancy (%) N=8690</b><br>Yes<br>No | 1339 (33)<br>2713 (67)       | 144 (3)<br>4494 (97) | 26 (5)<br>465 (95)                                        | 59 (5)<br>1130 (95)         | 7 (0.5)<br>1093 (99.5)      | 20 (1)<br>1388 (99)                      | 32 (7)<br>418 (93) |
| <b>Drank alcohol during pregnancy (%) N=8689</b><br>Yes<br>No     | 291 (7)<br>3762 (93)         | 0<br>4636 (100)      | 0<br>491 (100)                                            | 0<br>1190 (100)             | 0<br>1099 (100)             | 0<br>1407 (100)                          | 0<br>449 (100)     |
| <b>Mean maternal fasting blood glucose</b>                        | 4.4(0.4)                     | 4.6(0.6)             | 4.6(0.5)                                                  | 4.6(0.6)                    | 4.5(0.5)                    | 4.7(0.7)                                 | 4.6(0.5)           |
| <b>Mean maternal postload blood glucose</b>                       | 5.4(1.3)                     | 5.9(1.7)             | 5.6(1.3)                                                  | 5.8(1.6)                    | 5.8(1.5)                    | 6.2(1.9)                                 | 5.7(1.5)           |
| <b>Maternal hypertension N (%)</b><br>Mild / moderate             | 174(4)                       | 132(3)               | 11(2)                                                     | 42(4)                       | 21(2)                       | 49(3)                                    | 9(2)               |
| Severe                                                            | 32(1)                        | 29(0.5)              | 1(0.5)                                                    | 8(1)                        | 9(1)                        | 8(0.5)                                   | 3(0.5)             |
| <b>Pre-eclampsia N (%)</b>                                        | 76(2)                        | 74(2)                | 7(1)                                                      | 30(3)                       | 10(1)                       | 21(2)                                    | 6(1)               |

|                                                           |                 |                 |                |                 |                 |                 |                |
|-----------------------------------------------------------|-----------------|-----------------|----------------|-----------------|-----------------|-----------------|----------------|
| <b>Parity N (%)</b>                                       |                 |                 |                |                 |                 |                 |                |
| 0                                                         | 1891(48)        | 1404(32)        | 200(43)        | 367(32)         | 307(29)         | 326(24)         | 204(46)        |
| 1                                                         | 1237(32)        | 1183(26)        | 122(26)        | 295(26)         | 305(29)         | 334(25)         | 127(29)        |
| 2                                                         | 507(13)         | 930(21)         | 81(17)         | 237(21)         | 231(22)         | 311(23)         | 70(16)         |
| 3                                                         | 172(4)          | 564(13)         | 47(10)         | 140(12)         | 136(13)         | 219(16)         | 22(5)          |
| 4 or more                                                 | 111(3)          | 368(8)          | 16(4)          | 98(9)           | 74(7)           | 163(12)         | 17(4)          |
| <b>Married N (%)</b>                                      | <b>1317(32)</b> | <b>4538(98)</b> | <b>467(95)</b> | <b>1165(98)</b> | <b>1092(99)</b> | <b>1396(99)</b> | <b>418(93)</b> |
| <b>Living with a partner N (%)</b>                        | <b>2908(72)</b> | <b>4354(94)</b> | <b>455(93)</b> | <b>1088(91)</b> | <b>1076(98)</b> | <b>1340(95)</b> | <b>395(88)</b> |
| <b>Receipt of means tested benefits N (%)<sup>d</sup></b> | 1528(38)        | 2211(48)        | 200(41)        | 662(56)         | 466(42)         | 695(49)         | 188(42)        |
| <b>Housing tenure N(%):</b>                               |                 |                 |                |                 |                 |                 |                |
| Owns or mortgage                                          | 2132(53)        | 3259(70)        | 353(72)        | 888(75)         | 816(74)         | 929(66)         | 273(61)        |
| Rents privately                                           | 1012(25)        | 469(10)         | 33(7)          | 83(7)           | 50(5)           | 240(17)         | 63(14)         |
| Rents council/housing association                         | 649(16)         | 295(6)          | 25(5)          | 61(5)           | 54(5)           | 104(7)          | 51(11)         |
| Rents -other                                              | 250(6)          | 559(12)         | 72(15)         | 152(13)         | 157(14)         | 124(9)          | 54(12)         |
| Don't know                                                | 6(0.1)          | 56(1)           | 8(2)           | 6(0.5)          | 25(2)           | 10(0.5)         | 7(2)           |
| <b>Level of mother's education N (%)</b>                  |                 |                 |                |                 |                 |                 |                |
| <5 GCSE or equivalent                                     | 796(20)         | 1207(26)        | 52(10)         | 211(18)         | 385(35)         | 451(32)         | 108(24)        |
| 5 GCSE or equivalent                                      | 1400(35)        | 1453(31)        | 142(29)        | 408(34)         | 345(31)         | 425(30)         | 133(30)        |
| A Level or equivalent & above                             | 1471(36)        | 1778(39)        | 270(55)        | 496(42)         | 348(32)         | 480(34)         | 184(41)        |
| Overseas unknown / other                                  | 384(9)          | 199(4)          | 28(6)          | 75(6)           | 24(2)           | 48(4)           | 24(5)          |
| <b>Mother in current employment N (%)</b>                 | 2603(64)        | 1060(23)        | 224(45)        | 449(38)         | 91(8)           | 170(12)         | 126(28)        |

<sup>d</sup>Any of: Income Support; Job Seekers Allowance; Working Tax Credit; Housing Benefits

**Supplementary table 3 Mean difference in birthweight between Pakistani and White British infants with adjustment for potential explanatory/masking variables**

| Unadjusted and adjusted mean difference (95% CI) in birthweight (g) for Pakistani (N=4649) relative to White British (N=4055) origin infants for each potential explanatory / masking variable <sup>e</sup> |                                |                                                           |                                          |                                          |                                                       |                              |
|-------------------------------------------------------------------------------------------------------------------------------------------------------------------------------------------------------------|--------------------------------|-----------------------------------------------------------|------------------------------------------|------------------------------------------|-------------------------------------------------------|------------------------------|
|                                                                                                                                                                                                             | All Pakistani births<br>N=4649 | Pakistani sub-groups defined by place of birth of parents |                                          |                                          |                                                       |                              |
|                                                                                                                                                                                                             |                                | Pakistani:<br>Both parents UK born<br>N=492               | Pakistani:<br>Mum only UK born<br>N=1192 | Pakistani:<br>Dad only UK born<br>N=1104 | Pakistani:<br>Both parents South Asian born<br>N=1411 | Pakistani:<br>Other<br>N=450 |
| <b>Smoking<br/>N=8690</b>                                                                                                                                                                                   | <b>N=4638</b>                  | <b>N=491</b>                                              | <b>N=1189</b>                            | <b>N=1100</b>                            | <b>N=1408</b>                                         | <b>N=450</b>                 |
| Unadjusted mean difference                                                                                                                                                                                  | <b>-234<br/>(-254, -214)</b>   | -252<br>(-296, -208)                                      | -236<br>(-266, -206)                     | -251<br>(-282, -219)                     | -213<br>(-242, -185)                                  | -230<br>(-276, -185)         |
| Adjusted mean difference                                                                                                                                                                                    | <b>-293<br/>(-315, -272)</b>   | -308<br>(-352, -264)                                      | -291<br>(-323, -260)                     | -316<br>(-348, -284)                     | -276<br>(-306, -247)                                  | -282<br>(-328, -237)         |
| <b>Alcohol consumption<br/>N=8689</b>                                                                                                                                                                       | <b>N=4636</b>                  | <b>N=491</b>                                              | <b>N=1190</b>                            | <b>N=1099</b>                            | <b>N=1407</b>                                         | <b>N=449</b>                 |
| Unadjusted mean difference                                                                                                                                                                                  | <b>-234<br/>(-254, -214)</b>   | -252<br>(-296, -208)                                      | -236<br>(-267, -206)                     | -251<br>(-283, -220)                     | -213<br>(-242, -185)                                  | -230<br>(-276, -185)         |
| Adjusted mean difference                                                                                                                                                                                    | <b>-239<br/>(-259, -218)</b>   | -257<br>(-302, -213)                                      | -241<br>(-271, -210)                     | -256<br>(-287, -224)                     | -218<br>(-247, -189)                                  | -235<br>(-280, -189)         |
| <b>Maternal age<br/>N=8704</b>                                                                                                                                                                              | <b>N=4649</b>                  | <b>N=492</b>                                              | <b>N=1192</b>                            | <b>N=1104</b>                            | <b>N=1411</b>                                         | <b>N=450</b>                 |
| Unadjusted mean difference                                                                                                                                                                                  | <b>-233<br/>(-253, -214)</b>   | -251<br>(-295, -208)                                      | -236<br>(-266, -206)                     | -250<br>(-281, -219)                     | -213<br>(-241, -184)                                  | -230<br>(-275, -184)         |
| Adjusted mean difference                                                                                                                                                                                    | <b>-244<br/>(-264, -224)</b>   | -260<br>(-304, -216)                                      | -245<br>(-276, -215)                     | -258<br>(-289, -226)                     | -232<br>(-261, -204)                                  | -226<br>(-272, -179)         |
| <b>Maternal hypertension<br/>N=8704</b>                                                                                                                                                                     | <b>N=4649</b>                  | <b>N=492</b>                                              | <b>N=1192</b>                            | <b>N=1104</b>                            | <b>N=1411</b>                                         | <b>N=450</b>                 |
| Unadjusted mean difference                                                                                                                                                                                  | <b>-233<br/>(-253, -214)</b>   | -251<br>(-295, -208)                                      | -236<br>(-266, -206)                     | -250<br>(-281, -219)                     | -213<br>(-241, -184)                                  | -230<br>(-275, -184)         |
| Adjusted mean difference                                                                                                                                                                                    | <b>-234<br/>(-254, -215)</b>   | -254<br>(-298, -210)                                      | -236<br>(-267, -206)                     | -252<br>(-283, -220)                     | -213<br>(-242, -185)                                  | -232<br>(-278, -186)         |
| <b>Maternal fasting glucose<br/>N=8368</b>                                                                                                                                                                  | <b>N=4483</b>                  | <b>N=473</b>                                              | <b>N=1147</b>                            | <b>N=1072</b>                            | <b>N=1353</b>                                         | <b>N=438</b>                 |
| Unadjusted mean difference                                                                                                                                                                                  | <b>-232<br/>(-252, -212)</b>   | -252<br>(-297, -207)                                      | -235<br>(-266, -204)                     | -251<br>(-283, -219)                     | -209<br>(-238, -180)                                  | -229<br>(-276, -183)         |
| Adjusted mean difference                                                                                                                                                                                    | <b>-257<br/>(-277, -237)</b>   | -269<br>(-313, -225)                                      | -257<br>(-288, -226)                     | -266<br>(-297, -234)                     | -248<br>(-278, -219)                                  | -251<br>(-298, -205)         |
| <b>Maternal postload glucose<br/>N=8361</b>                                                                                                                                                                 | <b>N=4479</b>                  | <b>N=473</b>                                              | <b>N=1146</b>                            | <b>N=1072</b>                            | <b>N=1351</b>                                         | <b>N=437</b>                 |
| Unadjusted                                                                                                                                                                                                  | <b>-233</b>                    | -253                                                      | -236                                     | -252                                     | -209                                                  | -229                         |

|                                                      |                              |                      |                      |                      |                      |                       |
|------------------------------------------------------|------------------------------|----------------------|----------------------|----------------------|----------------------|-----------------------|
| mean difference                                      | <b>(-253, -212)</b>          | (-297, -208)         | (-267, -205)         | (-284, -220)         | (-238, -180)         | (-276, -183)          |
| Adjusted mean difference                             | <b>-239<br/>(-260, -219)</b> | -255<br>(-300, -211) | -241<br>(-272, -210) | -257<br>(-289, -225) | -220<br>(-250, -191) | -232<br>(-279, -186)  |
| <b>Maternal fasting insulin<br/>N=7840</b>           | <b>N=4066</b>                | N=433                | N=1054               | N=979                | N=1202               | N=398                 |
| Unadjusted mean difference                           | <b>-234<br/>(-254, -212)</b> | -242<br>(-289, -195) | -242<br>(-274, -209) | -255<br>(-288, -222) | -206<br>(-236, -175) | -227<br>(-276, -1779) |
| Adjusted mean difference                             | <b>-252<br/>(-354, -212)</b> | -256<br>(-302, -210) | -264<br>(-296, -232) | -266<br>(-299, -233) | -232<br>(-263, -202) | -254<br>(-304, -207)  |
| <b>Maternal height<br/>N=8512</b>                    | <b>N=4522</b>                | N=478                | N=1178               | N=1071               | N=1362               | N=438                 |
| Unadjusted mean difference                           | <b>-234<br/>(-254, -214)</b> | -252<br>(-296, -207) | -238<br>(-269, -208) | -251<br>(-282, -219) | -213<br>(-242, -184) | -227<br>(-274, -181)  |
| Adjusted mean difference                             | <b>-165<br/>(-186, -144)</b> | -198<br>(-242, -154) | -177<br>(-208, -146) | -167<br>(-199, -134) | -135<br>(-165, -106) | -178<br>(-224, -133)  |
| <b>Maternal BMI<br/>N=7991</b>                       | <b>N=4283</b>                | N=447                | N=1120               | N=1021               | N=1287               | N=408                 |
| Unadjusted mean difference                           | <b>-236<br/>(-256, -215)</b> | -249<br>(-295, -203) | -243<br>(-275, -212) | -249<br>(-282, -217) | -213<br>(-243, -183) | -238<br>(-286, -190)  |
| Adjusted mean difference                             | <b>-213<br/>(-233, -193)</b> | -204<br>(-249, -159) | -239<br>(-270, -209) | -205<br>(-237, -173) | -199<br>(-228, -170) | -213<br>(-260, -167)  |
| <b>Parity<br/>N=8367</b>                             | <b>N=4449</b>                | N=466                | N=1137               | N=1053               | N=1353               | N=440                 |
| Unadjusted mean difference                           | <b>-231<br/>(-252, -211)</b> | -250<br>(-296, -206) | -232<br>(-264, -201) | -249<br>(-281, -217) | -210<br>(-239, -181) | -231<br>(-278, -185)  |
| Adjusted mean difference                             | <b>-258<br/>(-278, -237)</b> | -260<br>(-304, -215) | -258<br>(-289, -227) | -277<br>(-309, -245) | -249<br>(-279, -219) | -235<br>(-281, -189)  |
| <b>Gestation<br/>N=8704</b>                          | <b>N=4649</b>                | N=492                | N=1192               | N=1104               | N=1411               | N=450                 |
| Unadjusted mean difference                           | <b>-233<br/>(-253, -214)</b> | -251<br>(-295, -208) | -236<br>(-266, -206) | -250<br>(-281, -219) | -213<br>(-241, -184) | -230<br>(-275, -184)  |
| Adjusted mean difference                             | <b>-201<br/>(-219, -182)</b> | -220<br>(-261, -179) | -204<br>(-232, -175) | -229<br>(-258, -199) | -175<br>(-202, -148) | -185<br>(-228, -143)  |
| <b>Sex<br/>N=8703</b>                                | <b>N=4648</b>                | N=492                | N=1191               | N=1104               | N=1411               | N=450                 |
| Unadjusted mean difference                           | <b>-233<br/>(-253, -214)</b> | -251<br>(-295, -208) | -236<br>(-266, -206) | -250<br>(-281, -219) | -213<br>(-241, -184) | -230<br>(-275, -184)  |
| Adjusted mean difference                             | <b>-233<br/>(-253, -213)</b> | -251<br>(-295, -207) | -237<br>(-267, -207) | -247<br>(-278, -216) | -212<br>(-240, -184) | -236<br>(-281, -190)  |
| <b>Socioeconomic position<sup>f</sup><br/>N=8643</b> | <b>N=4613</b>                | N=489                | N=1186               | N=1096               | N=1397               | N=445                 |
| Unadjusted mean difference                           | <b>-234<br/>(-254, -214)</b> | -253<br>(-297, -209) | -236<br>(-266, -206) | -250<br>(-282, -219) | -215<br>(-243, -186) | -229<br>(-276, -184)  |

|                                                                                                                                        |                                    |                      |                      |                      |                      |                      |
|----------------------------------------------------------------------------------------------------------------------------------------|------------------------------------|----------------------|----------------------|----------------------|----------------------|----------------------|
| Adjusted mean difference                                                                                                               | <b>-240</b><br><b>(-261, -219)</b> | -268<br>(-313, -223) | -248<br>(-280, -216) | -253<br>(-286, -220) | -218<br>(-247, -189) | -233<br>(-279, -187) |
| <b>Living with a partner</b><br><b>N=8690</b>                                                                                          | <b>N=4641</b>                      | N=490                | N=1190               | N=1103               | N=1408               | N=450                |
| Unadjusted mean difference                                                                                                             | <b>-233</b><br><b>(-253, -213)</b> | -254<br>(-298, -209) | -236<br>(-266, -205) | -250<br>(-281, -218) | -212<br>(-240, -183) | -231<br>(-277, -185) |
| Adjusted mean difference                                                                                                               | <b>-254</b><br><b>(-275, -233)</b> | -274<br>(-318, -229) | -254<br>(-285, -223) | -274<br>(-306, -242) | -234<br>(-263, -205) | -246<br>(-292, -200) |
| <b>Adjusted for covariables thought a priori to reduce the difference (socioeconomic position; maternal height)</b><br><b>N=8452</b>   | <b>N=4487</b>                      | N=475                | N=1168               | N=1063               | N=1348               | N=433                |
| Unadjusted mean difference                                                                                                             | <b>-235</b><br><b>(-255, -215)</b> | -256<br>(-297, -208) | -238<br>(-268, -207) | -251<br>(-283, -219) | -215<br>(-244, -186) | -226<br>(-273, -180) |
| Adjusted mean difference                                                                                                               | <b>-174</b><br><b>(-197, -152)</b> | -213<br>(-258, -168) | -191<br>(-222, -159) | -174<br>(-208, -140) | -144<br>(-174, -114) | -183<br>(-229, -137) |
| <b>Adjusted for covariables that did in practice reduce the difference (maternal height; maternal BMI; gestation)</b><br><b>N=7991</b> | <b>N=4283</b>                      | N=447                | N=1120               | N=1021               | N=1287               | N=408                |
| Unadjusted mean difference                                                                                                             | <b>-236</b><br><b>(-256, -215)</b> | -249<br>(-295, -203) | -243<br>(-275, -212) | -249<br>(-282, -217) | -213<br>(-243, -183) | -238<br>(-286, -190) |
| Adjusted mean difference                                                                                                               | <b>-119</b><br><b>(-139, -100)</b> | -118<br>(-160, -77)  | -154<br>(-182, -125) | -109<br>(-139, -78)  | -92<br>(-120, -64)   | -128<br>(-171, -85)  |
| <b>All above covariables<sup>g</sup></b><br><b>N=7342</b>                                                                              | <b>N=3919</b>                      | N=402                | N=1028               | N=936                | N=1169               | N=384                |
| Unadjusted mean difference                                                                                                             | <b>-235</b><br><b>(-256, -213)</b> | -253<br>(-301, -205) | -239<br>(-271, -206) | -252<br>(-286, -218) | -211<br>(-242, -180) | -236<br>(-286, -187) |
| Adjusted mean difference                                                                                                               | <b>-234</b><br><b>(-258, -210)</b> | -217<br>(-261, -173) | -253<br>(-285, -222) | -232<br>(-266, -198) | -229<br>(-260, -197) | -219<br>(-263, -175) |

<sup>e</sup> Number varies for each covariable due to differences in numbers with data for individual covariables

<sup>f</sup> Maternal education; housing tenure; receipt of means tested benefits

<sup>g</sup> Fasting glucose, postload glucose and fasting insulin were highly correlated thus postload glucose and fasting insulin were excluded from the fully adjusted model as they had the least effect and no impact on associations over that seen for fasting glucose

**Supplementary table 4 Mean difference in subscapular skinfold between Pakistani and White British infants with adjustment for potential explanatory/masking variables**

Unadjusted and adjusted mean difference (95% CI) in subscapular skinfold (mm) for Pakistani (N=3363) relative to White British (N=2678) origin infants for each potential explanatory / masking variable<sup>e</sup>

|                                             | All Pakistani births<br>N=3363  | Pakistani sub-groups defined by place of birth of parents |                                      |                                      |                                                    |                           |
|---------------------------------------------|---------------------------------|-----------------------------------------------------------|--------------------------------------|--------------------------------------|----------------------------------------------------|---------------------------|
|                                             |                                 | Pakistani: Both parents UK born<br>N=346                  | Pakistani: Mum only UK born<br>N=870 | Pakistani: Dad only UK born<br>N=801 | Pakistani: Both parents South Asian born<br>N=1031 | Pakistani: Other<br>N=315 |
| <b>Smoking<br/>N=6033</b>                   | <b>N=3356</b>                   | <i>N=345</i>                                              | <i>N=867</i>                         | <i>N=798</i>                         | <i>N=1031</i>                                      | <i>N=315</i>              |
| Unadjusted mean difference                  | <b>-0.19<br/>(-0.25, -0.14)</b> | -0.20<br>(-0.33, -0.08)                                   | -0.16<br>(-0.25, -0.08)              | -0.29<br>(-0.37, -0.20)              | -0.13<br>(-0.21, -0.05)                            | -0.22<br>(-0.35, -0.09)   |
| Adjusted mean difference                    | <b>-0.27<br/>(-0.33, -0.21)</b> | -0.27<br>(-0.40, -0.15)                                   | -0.23<br>(-0.32, -0.15)              | -0.37<br>(-0.46, -0.28)              | -0.21<br>(-0.29, -0.13)                            | -0.28<br>(-0.41, -0.16)   |
| <b>Alcohol consumption<br/>N=6032</b>       | <b>N=3354</b>                   | <i>N=345</i>                                              | <i>N=868</i>                         | <i>N=797</i>                         | <i>N=1030</i>                                      | <i>N=314</i>              |
| Unadjusted mean difference                  | <b>-0.19<br/>(-0.25, -0.14)</b> | -0.20<br>(-0.33, -0.08)                                   | -0.16<br>(-0.25, -0.08)              | -0.29<br>(-0.37, -0.20)              | -0.13<br>(-0.21, -0.05)                            | -0.21<br>(-0.34, -0.09)   |
| Adjusted mean difference                    | <b>-0.20<br/>(-.26, -0.14)</b>  | -0.21<br>(-0.33, -0.09)                                   | -0.17<br>(-0.26, -0.09)              | -0.29<br>(-0.38, -0.21)              | -0.14<br>(-0.22, -0.06)                            | -0.22<br>(-0.35, -0.09)   |
| <b>Maternal age<br/>N=6041</b>              | <b>N=3363</b>                   | <i>N=346</i>                                              | <i>N=870</i>                         | <i>N=801</i>                         | <i>N=1031</i>                                      | <i>N=315</i>              |
| Unadjusted mean difference                  | <b>-0.19<br/>(-0.25, -0.14)</b> | -0.21<br>(-0.33, -0.08)                                   | -0.17<br>(-0.25, -0.08)              | -0.28<br>(-0.37, -0.20)              | -0.13<br>(-0.21, -0.05)                            | -0.22<br>(-0.34, -0.09)   |
| Adjusted mean difference                    | <b>-0.22<br/>(-0.27, -0.16)</b> | -0.22<br>(-0.35, -0.10)                                   | -0.19<br>(-0.27, -0.10)              | -0.30<br>(-0.39, -0.22)              | -0.18<br>(-0.26, -0.10)                            | -0.21<br>(-0.33, -0.08)   |
| <b>Maternal hypertension<br/>N=6041</b>     | <b>N=3363</b>                   | <i>N=346</i>                                              | <i>N=870</i>                         | <i>N=801</i>                         | <i>N=1031</i>                                      | <i>N=315</i>              |
| Unadjusted mean difference                  | <b>-0.19<br/>(-0.25, -0.14)</b> | -0.21<br>(-0.33, -0.08)                                   | -0.17<br>(-0.25, -0.08)              | -0.28<br>(-0.37, -0.20)              | -0.13<br>(-0.21, -0.05)                            | -0.22<br>(-0.34, -0.09)   |
| Adjusted mean difference                    | <b>-0.19<br/>(-.25, -0.14)</b>  | -0.21<br>(-0.33, -0.09)                                   | -0.17<br>(-0.25, -0.08)              | -0.29<br>(-0.37, -0.20)              | -0.13<br>(-0.21, -0.05)                            | -0.22<br>(-0.35, -0.09)   |
| <b>Maternal fasting glucose<br/>N=5838</b>  | <b>N=3264</b>                   | <i>N=334</i>                                              | <i>N=841</i>                         | <i>N=784</i>                         | <i>N=995</i>                                       | <i>N=310</i>              |
| Unadjusted mean difference                  | <b>-0.19<br/>(-0.25, -0.14)</b> | -0.23<br>(-0.35, -0.10)                                   | -0.17<br>(-0.26, -0.09)              | -0.29<br>(-0.38, -0.20)              | -0.12<br>(-0.20, -0.04)                            | -0.22<br>(-0.35, -0.09)   |
| Adjusted mean difference                    | <b>-0.26<br/>(-0.32, -0.20)</b> | -0.27<br>(-0.39, -0.15)                                   | -0.22<br>(-0.31, -0.14)              | -0.33<br>(-0.41, -0.24)              | -0.22<br>(-0.30, -0.14)                            | -0.28<br>(-0.40, -0.15)   |
| <b>Maternal postload glucose<br/>N=5833</b> | <b>N=3262</b>                   | <i>N=334</i>                                              | <i>N=840</i>                         | <i>N=784</i>                         | <i>N=995</i>                                       | <i>N=309</i>              |

|                                                            |                                       |                         |                         |                         |                         |                         |
|------------------------------------------------------------|---------------------------------------|-------------------------|-------------------------|-------------------------|-------------------------|-------------------------|
| Unadjusted mean difference                                 | <b>-0.20</b><br><b>(-0.26, -0.14)</b> | -0.23<br>(-0.35, -0.11) | -0.17<br>(-0.26, -0.09) | -0.29<br>(-0.38, -0.20) | -0.13<br>(-0.21, -0.05) | -0.22<br>(-0.35, -0.09) |
| Adjusted mean difference                                   | <b>-0.23</b><br><b>(-0.29, -0.18)</b> | -0.24<br>(-0.36, -0.12) | -0.20<br>(-0.28, -0.11) | -0.32<br>(-0.41, -0.23) | -0.19<br>(-0.27, -0.11) | -0.24<br>(-0.37, -0.11) |
| <b>Maternal fasting insulin</b><br><b>N=5500</b>           | <b>N=2966</b>                         | <i>N=307</i>            | <i>N=781</i>            | <i>N=723</i>            | <i>N=880</i>            | <i>N=275</i>            |
| Unadjusted mean difference                                 | <b>-0.21</b><br><b>(-0.26, -0.15)</b> | -0.21<br>(-0.34, -0.08) | -0.16<br>(-0.25, -0.08) | -0.32<br>(-0.41, -0.23) | -0.14<br>(-0.22, -0.06) | -0.22<br>(-0.36, -0.09) |
| Adjusted mean difference                                   | <b>-0.25</b><br><b>(-0.31, -0.19)</b> | -0.23<br>(-0.36, -0.11) | -0.22<br>(-0.30, -0.13) | -0.34<br>(-0.43, -0.25) | -0.20<br>(-0.29, -0.12) | -0.29<br>(-0.43, -0.16) |
| <b>Maternal height</b><br><b>N=5937</b>                    | <b>N=3292</b>                         | <i>N=338</i>            | <i>N=859</i>            | <i>N=781</i>            | <i>N=1004</i>           | <i>N=310</i>            |
| Unadjusted mean difference                                 | <b>-0.19</b><br><b>(-0.25, -0.13)</b> | -0.19<br>(-0.32, -0.07) | -0.17<br>(-0.25, -0.08) | -0.28<br>(-0.37, -0.19) | -0.13<br>(-0.20, -0.05) | -0.22<br>(-0.35, -0.09) |
| Adjusted mean difference                                   | <b>-0.16</b><br><b>(-0.22, -0.10)</b> | -0.17<br>(-0.30, -0.05) | -0.15<br>(-0.23, -0.06) | -0.25<br>(-0.34, -0.16) | -0.96<br>(-0.18, -0.01) | -0.20<br>(-0.33, -0.07) |
| <b>Maternal BMI</b><br><b>N=5619</b>                       | <b>N=3137</b>                         | <i>N=320</i>            | <i>N=826</i>            | <i>N=741</i>            | <i>N=958</i>            | <i>N=292</i>            |
| Unadjusted mean difference                                 | <b>-0.19</b><br><b>(-0.25, -0.13)</b> | -0.18<br>(-0.30, -0.05) | -0.17<br>(-0.26, -0.09) | -0.27<br>(-0.36, -0.18) | -0.13<br>(-0.21, -0.05) | -0.23<br>(-0.36, -0.10) |
| Adjusted mean difference                                   | <b>-0.15</b><br><b>(-0.20, -0.09)</b> | -0.08<br>(-0.21, 0.04)  | -0.16<br>(-0.25, -0.08) | -0.19<br>(-0.28, -0.10) | -0.10<br>(-0.18, -0.02) | -0.18<br>(-0.31, -0.05) |
| <b>Parity</b><br><b>N=5855</b>                             | <b>N=3250</b>                         | <i>N=330</i>            | <i>N=844</i>            | <i>N=768</i>            | <i>N=998</i>            | <i>N=310</i>            |
| Unadjusted mean difference                                 | <b>-0.19</b><br><b>(-0.24, -0.13)</b> | -0.20<br>(-0.32, -0.07) | -0.15<br>(-0.24, -0.07) | -0.29<br>(-0.38, -0.20) | -0.13<br>(-0.21, -0.05) | -0.22<br>(-0.35, -0.09) |
| Adjusted mean difference                                   | <b>-0.27</b><br><b>(-0.32, -0.21)</b> | -0.23<br>(-0.36, -0.11) | -0.23<br>(-0.31, -0.14) | -0.38<br>(-0.47, -0.29) | -0.23<br>(-0.32, -0.15) | -0.23<br>(-0.36, -0.10) |
| <b>Gestation</b><br><b>N=6041</b>                          | <b>N=3363</b>                         | <i>N=346</i>            | <i>N=870</i>            | <i>N=801</i>            | <i>N=1031</i>           | <i>N=315</i>            |
| Unadjusted mean difference                                 | <b>-0.19</b><br><b>(-0.25, -0.14)</b> | -0.21<br>(-0.33, -0.08) | -0.17<br>(-0.25, -0.08) | -0.28<br>(-0.37, -0.20) | -0.13<br>(-0.21, -0.05) | -0.22<br>(-0.34, -0.09) |
| Adjusted mean difference                                   | <b>-0.18</b><br><b>(-0.24, -0.12)</b> | -0.19<br>(-0.31, -0.07) | -0.15<br>(-0.24, -0.07) | -0.28<br>(-0.36, -0.19) | -0.12<br>(-0.20, -0.04) | -0.20<br>(-0.33, -0.07) |
| <b>Sex</b><br><b>N=6040</b>                                | <b>N=3362</b>                         | <i>N=346</i>            | <i>N=869</i>            | <i>N=801</i>            | <i>N=1031</i>           | <i>N=315</i>            |
| Unadjusted mean difference                                 | <b>-0.19</b><br><b>(-0.25, -0.14)</b> | -0.21<br>(-0.33, -0.08) | -0.17<br>(-0.25, -0.08) | -0.28<br>(-0.37, -0.20) | -0.13<br>(-0.21, -0.05) | -0.22<br>(-0.34, -0.09) |
| Adjusted mean difference                                   | <b>-0.19</b><br><b>(-0.25, -0.14)</b> | -0.20<br>(-0.33, -0.08) | -0.16<br>(-0.25, -0.08) | -0.29<br>(-0.37, -0.20) | -0.13<br>(-0.21, -0.05) | -0.21<br>(-0.34, -0.08) |
| <b>Socioeconomic position<sup>f</sup></b><br><b>N=6007</b> | <b>N=3340</b>                         | <i>N=345</i>            | <i>N=866</i>            | <i>N=798</i>            | <i>N=1020</i>           | <i>N=311</i>            |
| Unadjusted                                                 | <b>-0.19</b>                          | -0.21                   | -0.17                   | -0.29                   | -0.13                   | -0.22                   |

|                                                                                                                                  |                                 |                         |                         |                         |                         |                         |
|----------------------------------------------------------------------------------------------------------------------------------|---------------------------------|-------------------------|-------------------------|-------------------------|-------------------------|-------------------------|
| mean difference                                                                                                                  | <b>(-0.25, -0.14)</b>           | (-0.33, -0.09)          | (-0.25, -0.09)          | (-0.37, -0.20)          | (-0.21, -0.05)          | (-0.35, -0.09)          |
| Adjusted mean difference                                                                                                         | <b>-0.22<br/>(-0.28, -0.16)</b> | -0.24<br>(-0.36, -0.12) | -0.22<br>(-0.30, -0.13) | -0.31<br>(-0.40, -0.22) | -0.15<br>(-0.23, -0.07) | -0.23<br>(-0.36, -0.10) |
| <b>Living with a partner<br/>N=6028</b>                                                                                          | <b>N=3356</b>                   | N=344                   | N=868                   | N=800                   | N=1029                  | N=315                   |
| Unadjusted mean difference                                                                                                       | <b>-0.19<br/>(-0.25, -0.14)</b> | -0.21<br>(-0.33, -0.09) | -0.17<br>(-0.25, -0.08) | -0.29<br>(-0.37, -0.20) | -0.13<br>(-0.21, -0.05) | -0.22<br>(-0.35, -0.09) |
| Adjusted mean difference                                                                                                         | <b>-0.23<br/>(-0.29, -0.17)</b> | -0.25<br>(-0.37, -0.13) | -0.20<br>(-0.29, -0.12) | -0.33<br>(-0.42, -0.24) | -0.17<br>(-0.25, -0.09) | -0.25<br>(-0.37, -0.12) |
| <b>Adjusted for covariables thought a priori to reduce the difference (socioeconomic position; maternal height)<br/>N=5904</b>   | <b>N=3270</b>                   | N=337                   | N=856                   | N=778                   | N=993                   | N=306                   |
| Unadjusted mean difference                                                                                                       | <b>-0.19<br/>(-0.25, -0.14)</b> | -0.20<br>(-0.32, -0.07) | -0.17<br>(-0.26, -0.09) | -0.28<br>(-0.37, -0.20) | -0.12<br>(-0.20, -0.04) | -0.22<br>(-0.35, -0.09) |
| Adjusted mean difference                                                                                                         | <b>-0.19<br/>(-0.25, -0.13)</b> | -0.20<br>(-0.33, -0.08) | -0.20<br>(-0.28, -0.11) | -0.28<br>(-0.37, -0.18) | -0.12<br>(-0.20, -0.03) | -0.21<br>(-0.34, -0.08) |
| <b>Adjusted for covariables that did in practice reduce the difference (maternal height; maternal BMI; gestation)<br/>N=5619</b> | <b>N=3137</b>                   | N=320                   | N=826                   | N=741                   | N=958                   | N=292                   |
| Unadjusted mean difference                                                                                                       | <b>-0.19<br/>(-0.25, -0.13)</b> | -0.18<br>(-0.30, -0.05) | -0.17<br>(-0.26, -0.09) | -0.27<br>(-0.36, -0.18) | -0.13<br>(-0.21, -0.05) | -0.23<br>(-0.36, -0.10) |
| Adjusted mean difference                                                                                                         | <b>-0.10<br/>(-0.17, -0.04)</b> | -0.04<br>(-0.17, 0.08)  | -0.13<br>(-0.22, -0.04) | -0.15<br>(-0.24, -0.05) | -0.59<br>(-0.14, 0.03)  | -0.15<br>(-0.28, -0.02) |
| <b>All above covariables<sup>g</sup><br/>N=5228</b>                                                                              | <b>N=2918</b>                   | N=293                   | N=771                   | N=691                   | N=883                   | N=280                   |
| Unadjusted mean difference                                                                                                       | <b>-0.19<br/>(-0.25, -0.13)</b> | -0.20<br>(-0.33, -0.07) | -0.17<br>(-0.25, -0.08) | -0.28<br>(-0.38, -0.19) | -0.12<br>(-0.21, -0.04) | -0.25<br>(-0.38, -0.11) |
| Adjusted mean difference                                                                                                         | <b>-0.29<br/>(-0.37, -0.22)</b> | -0.22<br>(-0.36, -0.08) | -0.29<br>(-0.39, -0.19) | -0.36<br>(-0.47, -0.26) | -0.28<br>(-0.38, -0.18) | -0.29<br>(-0.42, -0.15) |

<sup>e</sup> Number varies for each covariable due to differences in numbers with data for individual covariables

<sup>f</sup> Maternal education; housing tenure; receipt of means tested benefits

<sup>g</sup> Fasting glucose, postload glucose and fasting insulin were highly correlated thus postload glucose and fasting insulin were excluded from the fully adjusted model as they had the least effect and no impact on associations over that seen for fasting glucose

**Supplementary table 5 Mean difference in triceps skinfold between Pakistani and White British infants with adjustment for potential explanatory/masking variables**

| Unadjusted and adjusted mean difference (95% CI) in triceps skinfold (mm) for Pakistani (N=3373) relative to White British (N=2685) origin infants for each potential explanatory / masking variable <sup>e</sup> |                                 |                                                           |                                      |                                      |                                                    |                           |
|-------------------------------------------------------------------------------------------------------------------------------------------------------------------------------------------------------------------|---------------------------------|-----------------------------------------------------------|--------------------------------------|--------------------------------------|----------------------------------------------------|---------------------------|
|                                                                                                                                                                                                                   | All Pakistani births<br>N=3373  | Pakistani sub-groups defined by place of birth of parents |                                      |                                      |                                                    |                           |
|                                                                                                                                                                                                                   |                                 | Pakistani: Both parents UK born<br>N=346                  | Pakistani: Mum only UK born<br>N=872 | Pakistani: Dad only UK born<br>N=804 | Pakistani: Both parents South Asian born<br>N=1035 | Pakistani: Other<br>N=316 |
| <b>Smoking<br/>N=6050</b>                                                                                                                                                                                         | <b>N=3366</b>                   | <i>N=345</i>                                              | <i>N=869</i>                         | <i>N=801</i>                         | <i>N=1035</i>                                      | <i>N=316</i>              |
| Unadjusted mean difference                                                                                                                                                                                        | <b>-0.17<br/>(-0.23, -0.12)</b> | -0.24<br>(-0.36, -0.12)                                   | -0.13<br>(-0.22, -0.05)              | -0.26<br>(-0.34, -0.18)              | -0.11<br>(-0.19, -0.03)                            | -0.19<br>(-0.32, -0.07)   |
| Adjusted mean difference                                                                                                                                                                                          | <b>-0.25<br/>(-0.30, -0.19)</b> | -0.31<br>(-0.43, -0.18)                                   | -0.20<br>(-0.29, -0.12)              | -0.34<br>(-0.43, -0.25)              | -0.19<br>(-0.27, -0.11)                            | -0.26<br>(-0.39, -0.13)   |
| <b>Alcohol consumption<br/>N=6049</b>                                                                                                                                                                             | <b>N=3364</b>                   | <i>N=345</i>                                              | <i>N=870</i>                         | <i>N=800</i>                         | <i>N=1034</i>                                      | <i>N=315</i>              |
| Unadjusted mean difference                                                                                                                                                                                        | <b>-0.17<br/>(-0.23, -0.12)</b> | -0.24<br>(-0.36, -0.12)                                   | -0.14<br>(-0.22, -0.05)              | -0.26<br>(-0.34, -0.17)              | -0.11<br>(-0.19, -0.04)                            | -0.19<br>(-0.32, -0.07)   |
| Adjusted mean difference                                                                                                                                                                                          | <b>-0.18<br/>(-0.24, -0.13)</b> | -0.25<br>(-0.37, -0.13)                                   | -0.14<br>(-0.23, -0.06)              | -0.27<br>(-0.35, -0.18)              | -0.12<br>(-0.20, -0.04)                            | -0.20<br>(-0.33, -0.08)   |
| <b>Maternal age<br/>N=6058</b>                                                                                                                                                                                    | <b>N=3373</b>                   | <i>N=346</i>                                              | <i>N=872</i>                         | <i>N=804</i>                         | <i>N=1035</i>                                      | <i>N=316</i>              |
| Unadjusted mean difference                                                                                                                                                                                        | <b>-0.17<br/>(-0.23, -0.12)</b> | -0.24<br>(-0.36, -0.12)                                   | -0.14<br>(-0.22, -0.05)              | -0.26<br>(-0.34, -0.17)              | -0.11<br>(-0.19, -0.03)                            | -0.19<br>(-0.32, -0.07)   |
| Adjusted mean difference                                                                                                                                                                                          | <b>-0.20<br/>(-0.25, -0.14)</b> | -0.25<br>(-0.37, -0.13)                                   | -0.15<br>(-0.24, -0.07)              | -0.28<br>(-0.36, -0.19)              | -0.15<br>(-0.23, -0.08)                            | -0.18<br>(-0.31, -0.06)   |
| <b>Maternal hypertension<br/>N=6058</b>                                                                                                                                                                           | <b>N=3373</b>                   | <i>N=346</i>                                              | <i>N=872</i>                         | <i>N=804</i>                         | <i>N=1035</i>                                      | <i>N=316</i>              |
| Unadjusted mean difference                                                                                                                                                                                        | <b>-0.17<br/>(-0.23, -0.12)</b> | -0.24<br>(-0.36, -0.12)                                   | -0.14<br>(-0.22, -0.05)              | -0.26<br>(-0.34, -0.17)              | -0.11<br>(-0.19, -0.03)                            | -0.19<br>(-0.32, -0.07)   |
| Adjusted mean difference                                                                                                                                                                                          | <b>-0.18<br/>(-0.23, -0.12)</b> | -0.24<br>(-0.36, -0.12)                                   | -0.14<br>(-0.22, -0.06)              | -0.26<br>(-0.35, -0.18)              | -0.11<br>(-0.19, -0.04)                            | -0.20<br>(-0.32, -0.07)   |
| <b>Maternal fasting glucose<br/>N=5854</b>                                                                                                                                                                        | <b>N=3273</b>                   | <i>N=334</i>                                              | <i>N=843</i>                         | <i>N=786</i>                         | <i>N=999</i>                                       | <i>N=311</i>              |
| Unadjusted mean difference                                                                                                                                                                                        | <b>-0.18<br/>(-0.23, -0.12)</b> | -0.26<br>(-0.38, -0.13)                                   | -0.14<br>(-0.22, -0.05)              | -0.26<br>(-0.35, -0.18)              | -0.11<br>(-0.19, -0.03)                            | -0.20<br>(-0.33, -0.08)   |
| Adjusted mean difference                                                                                                                                                                                          | <b>-0.24<br/>(-0.30, -0.19)</b> | -0.30<br>(-0.42, -0.18)                                   | -0.19<br>(-0.27, -0.11)              | -0.30<br>(-0.39, -0.22)              | -0.21<br>(-0.29, -0.13)                            | -0.26<br>(-0.38, -0.13)   |
| <b>Maternal postload glucose<br/>N=5849</b>                                                                                                                                                                       | <b>N=3271</b>                   | <i>N=334</i>                                              | <i>N=842</i>                         | <i>N=786</i>                         | <i>N=999</i>                                       | <i>N=310</i>              |

|                                                            |                                       |                         |                         |                         |                         |                         |
|------------------------------------------------------------|---------------------------------------|-------------------------|-------------------------|-------------------------|-------------------------|-------------------------|
| Unadjusted mean difference                                 | <b>-0.18</b><br><b>(-0.23, -0.12)</b> | -0.26<br>(-0.38, -0.14) | -0.14<br>(-0.22, -0.06) | -0.27<br>(-0.35, -0.18) | -0.11<br>(-0.19, -0.03) | -0.20<br>(-0.33, -0.07) |
| Adjusted mean difference                                   | <b>-0.21</b><br><b>(-0.27, -0.16)</b> | -0.26<br>(-0.39, -0.15) | -0.16<br>(-0.25, -0.08) | -0.29<br>(-0.38, -0.21) | -0.17<br>(-0.25, -0.09) | -0.22<br>(-0.34, -0.09) |
| <b>Maternal fasting insulin</b><br><b>N=5514</b>           | <b>N=2973</b>                         | <i>N=307</i>            | <i>N=783</i>            | <i>N=724</i>            | <i>N=883</i>            | <i>N=276</i>            |
| Unadjusted mean difference                                 | <b>-0.19</b><br><b>(-0.25, -0.14)</b> | -0.24<br>(-0.37, -0.12) | -0.14<br>(-0.24, -0.06) | -0.29<br>(-0.38, -0.21) | -0.13<br>(-0.21, -0.05) | -0.20<br>(-0.34, -0.07) |
| Adjusted mean difference                                   | <b>-0.23</b><br><b>(-0.29, -0.18)</b> | -0.26<br>(-0.39, -0.14) | -0.19<br>(-0.28, -0.11) | -0.32<br>(-0.41, -0.23) | -0.19<br>(-0.27, -0.11) | -0.27<br>(-0.40, -0.14) |
| <b>Maternal height</b><br><b>N=5954</b>                    | <b>N=2653</b>                         | <i>N=338</i>            | <i>N=861</i>            | <i>N=784</i>            | <i>N=1008</i>           | <i>N=311</i>            |
| Unadjusted mean difference                                 | <b>-0.17</b><br><b>(-0.23, -0.12)</b> | -0.23<br>(-0.35, -0.11) | -0.14<br>(-0.22, -0.06) | -0.26<br>(-0.34, -0.17) | -0.11<br>(-0.19, -0.03) | -0.20<br>-0.33, -0.08)  |
| Adjusted mean difference                                   | <b>-0.13</b><br><b>(-0.19, -0.08)</b> | -0.20<br>(-0.32, -0.07) | -0.10<br>(-0.19, -0.02) | -0.21<br>(-0.30, -0.12) | -0.07<br>(-0.15, 0.01)  | -0.17<br>(-0.30, -0.05) |
| <b>Maternal BMI</b><br><b>N=5636</b>                       | <b>N=3147</b>                         | <i>N=320</i>            | <i>N=828</i>            | <i>N=744</i>            | <i>N=962</i>            | <i>N=293</i>            |
| Unadjusted mean difference                                 | <b>-0.17</b><br><b>(-0.23, -0.11)</b> | -0.22<br>(-0.35, -0.10) | -0.14<br>(-0.22, -0.05) | -0.25<br>(-0.34, -0.16) | -0.11<br>(-0.19, -0.03) | -0.20<br>(-0.33, -0.07) |
| Adjusted mean difference                                   | <b>-0.13</b><br><b>(-0.19, -0.07)</b> | -0.14<br>(-0.26, -0.01) | -0.13<br>(-0.21, -0.04) | -0.17<br>(-0.26, -0.09) | -0.09<br>(-0.17, -0.01) | -0.16<br>(-0.28, -0.03) |
| <b>Parity</b><br><b>N=5871</b>                             | <b>N=3259</b>                         | <i>N=330</i>            | <i>N=845</i>            | <i>N=771</i>            | <i>N=1002</i>           | <i>N=311</i>            |
| Unadjusted mean difference                                 | <b>-0.17</b><br><b>(-0.22, -0.11)</b> | -0.24<br>(-0.36, -0.11) | -0.12<br>(-0.20, -0.04) | -0.26<br>(-0.35, -0.18) | -0.10<br>(-0.18, -0.03) | -0.19<br>(-0.32, -0.07) |
| Adjusted mean difference                                   | <b>-0.23</b><br><b>(-0.29, -0.18)</b> | -0.27<br>(-0.39, -0.15) | -0.18<br>(-0.27, -0.10) | -0.34<br>(-0.42, -0.25) | -0.20<br>(-0.28, -0.12) | -0.20<br>(-0.32, -0.08) |
| <b>Gestation</b><br><b>N=6058</b>                          | <b>N=3373</b>                         | <i>N=346</i>            | <i>N=872</i>            | <i>N=804</i>            | <i>N=1035</i>           | <i>N=316</i>            |
| Unadjusted mean difference                                 | <b>-0.17</b><br><b>(-0.23, -0.12)</b> | -0.24<br>(-0.36, -0.12) | -0.14<br>(-0.22, -0.05) | -0.26<br>(-0.34, -0.17) | -0.11<br>(-0.19, -0.03) | -0.19<br>(-0.32, -0.07) |
| Adjusted mean difference                                   | <b>-0.16</b><br><b>(-0.21, -0.10)</b> | -0.22<br>(-0.34, -0.10) | -0.12<br>(-0.20, -0.04) | -0.25<br>(-0.33, -0.16) | -0.09<br>(-0.17, -0.01) | -0.17<br>(-0.29, -0.04) |
| <b>Sex</b><br><b>N=6057</b>                                | <b>N=3372</b>                         | <i>N=346</i>            | <i>N=871</i>            | <i>N=804</i>            | <i>N=1035</i>           | <i>N=316</i>            |
| Unadjusted mean difference                                 | <b>-0.17</b><br><b>(-0.23, -0.12)</b> | -0.24<br>(-0.36, -0.12) | -0.13<br>(-0.22, -0.05) | -0.26<br>(-0.34, -0.17) | -0.11<br>(-0.19, -0.03) | -0.19<br>(-0.32, -0.07) |
| Adjusted mean difference                                   | <b>-0.17</b><br><b>(-0.23, -0.12)</b> | -0.24<br>(-0.36, -0.12) | -0.13<br>(-0.22, -0.05) | -0.26<br>(-0.35, -0.18) | -0.11<br>(-0.19, -0.03) | -0.19<br>(-0.31, -0.06) |
| <b>Socioeconomic position<sup>f</sup></b><br><b>N=6024</b> | <b>N=3350</b>                         | <i>N=345</i>            | <i>N=868</i>            | <i>N=801</i>            | <i>N=1024</i>           | <i>N=312</i>            |
| Unadjusted                                                 | <b>-0.17</b>                          | -0.24                   | -0.13                   | -0.26                   | -0.11                   | -0.19                   |

|                                                                                                                                        |                                       |                         |                         |                         |                         |                         |
|----------------------------------------------------------------------------------------------------------------------------------------|---------------------------------------|-------------------------|-------------------------|-------------------------|-------------------------|-------------------------|
| mean difference                                                                                                                        | <b>(-0.23, -0.12)</b>                 | (-0.36, -0.12)          | (-0.22, -0.05)          | (-0.34, -0.17)          | (-0.19, -0.03)          | (-0.31, -0.06)          |
| Adjusted mean difference                                                                                                               | <b>-0.20</b><br><b>(-0.26, -0.15)</b> | -0.27<br>(-0.39, -0.15) | -0.18<br>(-0.27, -0.10) | -0.29<br>(-0.38, -0.20) | -0.14<br>(-0.22, -0.06) | -0.20<br>(-0.33, -0.08) |
| <b>Living with a partner</b><br><b>N=6045</b>                                                                                          | <b>N=3366</b>                         | N=344                   | N=870                   | N=803                   | N=1033                  | N=316                   |
| Unadjusted mean difference                                                                                                             | <b>-0.17</b><br><b>(-0.23, -0.12)</b> | -0.24<br>(-0.36, -0.12) | -0.14<br>(-0.22, -0.06) | -0.26<br>(-0.35, -0.18) | -0.11<br>(-0.18, -0.03) | -0.20<br>(-0.32, -0.07) |
| Adjusted mean difference                                                                                                               | <b>-0.21</b><br><b>(-0.26, -0.15)</b> | -0.27<br>(-0.39, -0.15) | -0.17<br>(-0.25, -0.09) | -0.30<br>(-0.39, -0.21) | -0.14<br>(-0.22, -0.06) | -0.22<br>(-0.35, -0.09) |
| <b>Adjusted for covariables thought a priori to reduce the difference (socioeconomic position; maternal height)</b><br><b>N=5921</b>   | <b>N=3280</b>                         | N=337                   | N=858                   | N=781                   | N=997                   | N=307                   |
| Unadjusted mean difference                                                                                                             | <b>-0.17</b><br><b>(-0.23, -0.12)</b> | -0.23<br>(-0.35, -0.11) | -0.14<br>(-0.22, -0.05) | -0.26<br>(-0.34, -0.17) | -0.11<br>(-0.19, -0.03) | -0.20<br>(-0.32, -0.07) |
| Adjusted mean difference                                                                                                               | <b>-0.16</b><br><b>(-0.22, -0.10)</b> | -0.23<br>(-0.35, -0.10) | -0.15<br>(-0.24, -0.06) | -0.24<br>(-0.33, -0.15) | -0.09<br>(-0.17, -0.01) | -0.18<br>(-0.31, -0.05) |
| <b>Adjusted for covariables that did in practice reduce the difference (maternal height; maternal BMI; gestation)</b><br><b>N=5636</b> | <b>N=3147</b>                         | N=320                   | N=828                   | N=744                   | N=962                   | N=293                   |
| Unadjusted mean difference                                                                                                             | <b>-0.17</b><br><b>(-0.23, -0.11)</b> | -0.22<br>(-0.35, -0.10) | -0.14<br>(-0.22, -0.05) | -0.25<br>(-0.34, -0.16) | -0.11<br>(-0.34, -0.16) | -0.20<br>(-0.33, -0.07) |
| Adjusted mean difference                                                                                                               | <b>-0.07</b><br><b>(-0.13, -0.01)</b> | -0.08<br>(-0.21, 0.04)  | -0.08<br>(-0.16, 0.01)  | -0.11<br>(-0.20, -0.02) | -0.03<br>(-0.11, 0.05)  | -0.10<br>(-0.23, 0.02)  |
| <b>All above covariables<sup>g</sup></b><br><b>N=5243</b>                                                                              | <b>N=2926</b>                         | N=293                   | N=772                   | N=693                   | N=887                   | N=281                   |
| Unadjusted mean difference                                                                                                             | <b>-0.17</b><br><b>(-0.23, -0.11)</b> | -0.24<br>(-0.37, -0.11) | -0.12<br>(-0.20, -0.03) | -0.26<br>(-0.35, -0.17) | -0.11<br>(-0.19, -0.03) | -0.21<br>(-0.34, -0.07) |
| Adjusted mean difference                                                                                                               | <b>-0.25</b><br><b>(-0.32, -0.18)</b> | -0.25<br>(-0.38, -0.11) | -0.22<br>(-0.32, -0.12) | -0.32<br>(-0.42, -0.21) | -0.25<br>(-0.34, -0.15) | -0.24<br>(-0.37, -0.10) |

<sup>e</sup> Number varies for each covariable due to differences in numbers with data for individual covariables

<sup>f</sup> Maternal education; housing tenure; receipt of means tested benefits

<sup>g</sup> Fasting glucose, postload glucose and fasting insulin were highly correlated thus postload glucose and fasting insulin were excluded from the fully adjusted model as they had the least effect and no impact on associations over that seen for fasting glucose

**Supplementary table 6 Cord blood leptin concentration for Pakistani infants relative to White British infants with adjustment for potential explanatory/masking variables.  
Values are ratios of geometric means**

| Unadjusted and adjusted cord leptin ratios of geometric means (95% CI) for Pakistani relative to White British origin infants for each potential explanatory / masking variable <sup>e</sup> |                               |                                                           |                                      |                                      |                                                   |                          |
|----------------------------------------------------------------------------------------------------------------------------------------------------------------------------------------------|-------------------------------|-----------------------------------------------------------|--------------------------------------|--------------------------------------|---------------------------------------------------|--------------------------|
|                                                                                                                                                                                              | All Pakistani births<br>N=775 | Pakistani sub-groups defined by place of birth of parents |                                      |                                      |                                                   |                          |
|                                                                                                                                                                                              |                               | Pakistani: Both parents UK born<br>N=75                   | Pakistani: Mum only UK born<br>N=245 | Pakistani: Dad only UK born<br>N=211 | Pakistani: Both parents South Asian born<br>N=174 | Pakistani: Other<br>N=70 |
| <b>Smoking<br/>N=1385</b>                                                                                                                                                                    | <b>N=773</b>                  | <b>N=75</b>                                               | <b>N=245</b>                         | <b>N=210</b>                         | <b>N=173</b>                                      | <b>N=70</b>              |
| Unadjusted mean difference                                                                                                                                                                   | <b>1.11<br/>(1.01, 1.21)</b>  | 1.09<br>(0.90, 1.33)                                      | 1.20<br>(1.06, 1.35)                 | 1.08<br>(0.95, 1.23)                 | 1.06<br>(0.92, 1.21)                              | 1.01<br>(0.83, 1.24)     |
| Adjusted mean difference                                                                                                                                                                     | <b>1.06<br/>(0.96, 1.17)</b>  | 1.05<br>(0.86, 1.28)                                      | 1.15<br>(1.01, 1.31)                 | 1.04<br>(0.91, 1.19)                 | 1.01<br>(0.88, 1.17)                              | 0.98<br>(0.80, 1.20)     |
| <b>Alcohol consumption<br/>N=1385</b>                                                                                                                                                        | <b>N=774</b>                  | <b>N=75</b>                                               | <b>N=245</b>                         | <b>N=211</b>                         | <b>N=173</b>                                      | <b>N=70</b>              |
| Unadjusted mean difference                                                                                                                                                                   | <b>1.10<br/>(1.01, 1.20)</b>  | 1.09<br>(0.89, 1.32)                                      | 1.20<br>(1.06, 1.35)                 | 1.07<br>(0.94, 1.21)                 | 1.06<br>(0.92, 1.21)                              | 1.01<br>(0.83, 1.24)     |
| Adjusted mean difference                                                                                                                                                                     | <b>1.10<br/>(1.01, 1.21)</b>  | 1.09<br>(0.89, 1.33)                                      | 1.12<br>(1.06, 1.36)                 | 1.07<br>(0.94, 1.22)                 | 1.06<br>(0.92, 1.21)                              | 1.01<br>(0.83, 1.24)     |
| <b>Maternal age<br/>N=1387</b>                                                                                                                                                               | <b>N=775</b>                  | <b>N=75</b>                                               | <b>N=245</b>                         | <b>N=211</b>                         | <b>N=174</b>                                      | <b>N=70</b>              |
| Unadjusted mean difference                                                                                                                                                                   | <b>1.11<br/>(1.01, 1.21)</b>  | 1.09<br>(0.89, 1.32)                                      | 1.20<br>(1.06, 1.35)                 | 1.07<br>(0.94, 1.21)                 | 1.07<br>(0.93, 1.23)                              | 1.01<br>(0.83, 1.24)     |
| Adjusted mean difference                                                                                                                                                                     | <b>1.08<br/>(0.99, 1.18)</b>  | 1.08<br>(0.89, 1.32)                                      | 1.13<br>(1.00, 1.28)                 | 1.06<br>(0.93, 1.21)                 | 1.06<br>(0.93, 1.22)                              | 1.03<br>(0.84, 1.26)     |
| <b>Maternal hypertension<br/>N=1387</b>                                                                                                                                                      | <b>N=775</b>                  | <b>N=75</b>                                               | <b>N=245</b>                         | <b>N=211</b>                         | <b>N=174</b>                                      | <b>N=70</b>              |
| Unadjusted mean difference                                                                                                                                                                   | <b>1.11<br/>(1.01, 1.21)</b>  | 1.09<br>(0.89, 1.32)                                      | 1.20<br>(1.06, 1.35)                 | 1.07<br>(0.94, 1.21)                 | 1.07<br>(0.93, 1.23)                              | 1.01<br>(0.83, 1.24)     |
| Adjusted mean difference                                                                                                                                                                     | <b>1.10<br/>(1.01, 1.21)</b>  | 1.01<br>(0.83, 1.23)                                      | 1.09<br>(0.96, 1.23)                 | 1.03<br>(0.90, 1.17)                 | 1.02<br>(0.89, 1.17)                              | 0.92<br>(0.75, 1.12)     |
| <b>Maternal fasting glucose<br/>N=1333</b>                                                                                                                                                   | <b>N=749</b>                  | <b>N=72</b>                                               | <b>N=234</b>                         | <b>N=204</b>                         | <b>N=170</b>                                      | <b>N=69</b>              |
| Unadjusted mean difference                                                                                                                                                                   | <b>1.11<br/>(1.01, 1.21)</b>  | 1.08<br>(0.89, 1.32)                                      | 1.20<br>(1.06, 1.36)                 | 1.08<br>(0.95, 1.23)                 | 1.07<br>(0.93, 1.23)                              | 0.99<br>(0.81, 1.22)     |
| Adjusted mean difference                                                                                                                                                                     | <b>1.03<br/>(0.94, 1.13)</b>  | 1.01<br>(0.83, 1.23)                                      | 1.09<br>(0.96, 1.23)                 | 1.02<br>(0.90, 1.17)                 | 1.02<br>(0.89, 1.17)                              | 0.92<br>(0.75, 1.12)     |
| <b>Maternal postload glucose</b>                                                                                                                                                             |                               |                                                           |                                      |                                      |                                                   |                          |

|                                                            |                                    |                      |                      |                      |                      |                      |
|------------------------------------------------------------|------------------------------------|----------------------|----------------------|----------------------|----------------------|----------------------|
| <b>N=1331</b>                                              | <b>N=749</b>                       | <b>N=72</b>          | <b>N=234</b>         | <b>N=204</b>         | <b>N=170</b>         | <b>N=69</b>          |
| Unadjusted mean difference                                 | <b>1.11</b><br><b>(1.01, 1.21)</b> | 1.08<br>(0.89, 1.32) | 1.20<br>(1.06, 1.36) | 1.08<br>(0.95, 1.23) | 1.07<br>(0.93, 1.23) | 0.99<br>(0.81, 1.22) |
| Adjusted mean difference                                   | <b>1.07</b><br><b>(0.98, 1.17)</b> | 1.08<br>(0.89, 1.32) | 1.13<br>(1.00, 1.28) | 1.07<br>(0.94, 1.21) | 1.02<br>(0.89, 1.18) | 0.99<br>(0.81, 1.21) |
| <b>Maternal fasting insulin</b><br><b>N=1237</b>           | <b>N=695</b>                       | <b>N=66</b>          | <b>N=215</b>         | <b>N=192</b>         | <b>N=159</b>         | <b>N=63</b>          |
| Unadjusted mean difference                                 | <b>1.09</b><br><b>(1.00, 1.19)</b> | 1.15<br>(0.93, 1.41) | 1.18<br>(1.04, 1.35) | 1.07<br>(0.94, 1.23) | 1.05<br>(0.91, 1.21) | 0.90<br>(0.73, 1.11) |
| Adjusted mean difference                                   | <b>1.05</b><br><b>(0.96, 1.14)</b> | 1.15<br>(0.93, 1.41) | 1.18<br>(1.04, 1.35) | 1.07<br>(0.94, 1.23) | 1.05<br>(0.91, 1.21) | 0.90<br>(0.73, 1.11) |
| <b>Maternal height</b><br><b>N=1379</b>                    | <b>N=769</b>                       | <b>N=74</b>          | <b>N=242</b>         | <b>N=211</b>         | <b>N=173</b>         | <b>N=69</b>          |
| Unadjusted mean difference                                 | <b>1.10</b><br><b>(1.01, 1.20)</b> | 1.10<br>(0.90, 1.33) | 1.19<br>(1.06, 1.35) | 1.07<br>(0.94, 1.22) | 1.07<br>(0.93, 1.23) | 1.07<br>(0.93, 1.23) |
| Adjusted mean difference                                   | <b>1.11</b><br><b>(1.01, 1.22)</b> | 1.10<br>(0.90, 1.35) | 1.21<br>(1.06, 1.37) | 1.08<br>(0.95, 1.23) | 1.08<br>(0.94, 1.25) | 1.00<br>(0.82, 1.24) |
| <b>Maternal BMI</b><br><b>N=1268</b>                       | <b>N=707</b>                       | <b>N=68</b>          | <b>N=221</b>         | <b>N=196</b>         | <b>N=155</b>         | <b>N=67</b>          |
| Unadjusted mean difference                                 | <b>1.09</b><br><b>(0.99, 1.19)</b> | 1.10<br>(0.89, 1.36) | 1.20<br>(1.05, 1.36) | 1.05<br>(0.92, 1.21) | 1.03<br>(0.89, 1.20) | 0.98<br>(0.80, 1.21) |
| Adjusted mean difference                                   | <b>1.17</b><br><b>(1.06, 1.28)</b> | 1.23<br>(1.00, 1.51) | 1.27<br>(1.12, 1.43) | 1.09<br>(0.95, 1.24) | 1.15<br>(1.00, 1.33) | 1.06<br>(0.87, 1.31) |
| <b>Parity</b><br><b>N=1347</b>                             | <b>N=750</b>                       | <b>N=72</b>          | <b>N=238</b>         | <b>N=204</b>         | <b>N=167</b>         | <b>N=69</b>          |
| Unadjusted mean difference                                 | <b>1.10</b><br><b>(1.01, 1.21)</b> | 1.10<br>(0.90, 1.34) | 1.19<br>(1.06, 1.35) | 1.07<br>(0.94, 1.22) | 1.07<br>(0.93, 1.23) | 1.01<br>(0.82, 1.24) |
| Adjusted mean difference                                   | <b>1.07</b><br><b>(0.98, 1.17)</b> | 1.08<br>(0.88, 1.31) | 1.15<br>(1.01, 1.30) | 1.04<br>(0.92, 1.19) | 1.04<br>(0.90, 1.20) | 1.00<br>(0.81, 1.22) |
| <b>Gestation</b><br><b>N=1387</b>                          | <b>N=775</b>                       | <b>N=75</b>          | <b>N=245</b>         | <b>N=211</b>         | <b>N=174</b>         | <b>N=70</b>          |
| Unadjusted mean difference                                 | <b>1.11</b><br><b>(1.01, 1.21)</b> | 1.09<br>(0.89, 1.33) | 1.20<br>(1.06, 1.36) | 1.07<br>(0.94, 1.22) | 1.07<br>(0.93, 1.23) | 1.01<br>(0.83, 1.24) |
| Adjusted mean difference                                   | <b>1.12</b><br><b>(1.03, 1.22)</b> | 1.12<br>(0.92, 1.36) | 1.23<br>(1.09, 1.38) | 1.08<br>(0.95, 1.23) | 1.08<br>(0.93, 1.23) | 1.05<br>(0.86, 1.28) |
| <b>Sex</b><br><b>N=1387</b>                                | <b>N=775</b>                       | <b>N=75</b>          | <b>N=245</b>         | <b>N=211</b>         | <b>N=174</b>         | <b>N=70</b>          |
| Unadjusted mean difference                                 | <b>1.11</b><br><b>(1.01, 1.21)</b> | 1.09<br>(0.89, 1.33) | 1.20<br>(1.06, 1.36) | 1.07<br>(0.94, 1.22) | 1.07<br>(0.93, 1.23) | 1.01<br>(0.83, 1.24) |
| Adjusted mean difference                                   | <b>1.10</b><br><b>(1.01, 1.20)</b> | 1.11<br>(0.92, 1.35) | 1.19<br>(1.05, 1.33) | 1.09<br>(0.96, 1.23) | 1.05<br>(0.92, 1.20) | 0.97<br>(0.80, 1.19) |
| <b>Socioeconomic position<sup>†</sup></b><br><b>N=1378</b> | <b>N=768</b>                       | <b>N=75</b>          | <b>N=240</b>         | <b>N=210</b>         | <b>N=174</b>         | <b>N=69</b>          |

|                                                          |                                    |                      |                      |                      |                      |                      |
|----------------------------------------------------------|------------------------------------|----------------------|----------------------|----------------------|----------------------|----------------------|
| Unadjusted mean difference                               | <b>1.11</b><br><b>(1.02, 1.21)</b> | 1.09<br>(0.90, 1.33) | 1.21<br>(1.07, 1.37) | 1.07<br>(0.94, 1.22) | 1.07<br>(0.94, 1.22) | 1.04<br>(0.85, 1.27) |
| Adjusted mean difference                                 | <b>1.08</b><br><b>(0.98, 1.19)</b> | 1.10<br>(0.90, 1.35) | 1.17<br>(1.02, 1.32) | 1.05<br>(0.92, 1.20) | 1.02<br>(0.88, 1.18) | 1.02<br>(0.83, 1.25) |
| <b>Living with a partner</b><br><b>N=1383</b>            | <b>N=772</b>                       | <b>N=74</b>          | <b>N=244</b>         | <b>N=211</b>         | <b>N=173</b>         | <b>N=70</b>          |
| Unadjusted mean difference                               | <b>1.11</b><br><b>(1.01, 1.21)</b> | 1.10<br>(0.90, 1.34) | 1.20<br>(1.06, 1.36) | 1.07<br>(0.94, 1.22) | 1.07<br>(0.93, 1.23) | 1.01<br>(0.83, 1.24) |
| Adjusted mean difference                                 | <b>1.07</b><br><b>(0.98, 1.17)</b> | 1.06<br>(0.87, 1.30) | 1.16<br>(1.02, 1.31) | 1.04<br>(0.91, 1.18) | 1.03<br>(0.90, 1.19) | 0.99<br>(0.81, 1.22) |
| <b>Fully adjusted model<sup>c</sup></b><br><b>N=1130</b> | <b>N=617</b>                       | <b>N=58</b>          | <b>N=188</b>         | <b>N=174</b>         | <b>N=137</b>         | <b>N=60</b>          |
| Unadjusted mean difference                               | <b>1.08</b><br><b>(0.98, 1.19)</b> | 1.16<br>(0.93, 1.45) | 1.20<br>(1.05, 1.38) | 1.08<br>(0.94, 1.24) | 1.00<br>(0.86, 1.17) | 0.87<br>(0.69, 1.08) |
| Adjusted mean difference                                 | <b>1.03</b><br><b>(0.92, 1.14)</b> | 1.16<br>(0.93, 1.45) | 1.09<br>(0.94, 1.26) | 1.02<br>(0.88, 1.18) | 0.99<br>(0.85, 1.17) | 0.84<br>(0.67, 1.04) |

<sup>e</sup> Number varies for each covariable due to differences in numbers with data for individual covariables

<sup>f</sup> Maternal education; housing tenure; receipt of means tested benefits

<sup>c</sup>To maintain statistical power only those covariables that had an effect were included in the final model:  
smoking;maternal fasting glucose; maternal postload glucose; maternal fasting insulin; maternal BMI; living with a partner
